# Supplementary material
Source: publisher site journal article supplement (https://www.dovepress.com/article/306403)
Supplement: Supplementary file 1 [file get_supplementary_file.php]

## APPENDIX 1

Appendix 1a. Table S1: Advanced search history in Embase from inception to July 2019

| # | Searches                           | Results | Type     |
|---|------------------------------------|---------|----------|
| 1 | exp fibromyalgia/                  | 19166   | Advanced |
| 2 | "fibromyalgi*".ab,kw,ti.           | 15965   | Advanced |
| 3 | 1 or 2                             | 20675   | Advanced |
| 4 | "nocicept* flex* refle*".ab,kw,ti. | 484     | Advanced |
| 5 | exp flexor reflex/                 | 2610    | Advanced |
| 6 | RIII.mp.                           | 1119    | Advanced |
| 7 | nocicept* flex* reflex.mp.         | 469     | Advanced |
| 8 | 4 or 5 or 6 or 7                   | 3818    | Advanced |
| 9 | 3 and 8                            | 34      | Advanced |

Appendix 1b. Table S2: Advanced search in Cochrane Clinical Answers (CCA), Cochrane Central Register of Controlled Trials (CCRCT), Cochrane Database of Systematic Reviews (CDSR) from inception to July 2019

| # | Searches                                       | Results | Type     |
|---|------------------------------------------------|---------|----------|
| 1 | Fibromyalgia.mp. or exp Fibromyalgia/          | 2769    | Advanced |
| 2 | "Fibromyalgi*".ab,hw,kf,kw,sy,ti,tw.           | 2776    | Advanced |
| 3 | 1 or 2                                         | 2776    | Advanced |
| 4 | "nocicept* flex* refle*".ab,hw,kf,kw,sy,ti,tw. | 102     | Advanced |
| 5 | flexion reflex.mp.                             | 114     | Advanced |
| 6 | RIII.mp.                                       | 126     | Advanced |
| 7 | 4 or 5 or 6                                    | 222     | Advanced |
| 8 | 3 and 7                                        | 13      | Advanced |

Appendix 1c. Table S3: Advanced search in PsycINFO Inception to June Week 4 2019

| # | Searches                                              | Results | Type     |
|---|-------------------------------------------------------|---------|----------|
| 1 | Fibromyalgia.mp. or exp Fibromyalgia/                 | 3276    | Advanced |
| 2 | "Fibromyalgi*".ab,hw,kf,kw,sy,ti,tw.                  | 3153    | Advanced |
| 3 | "nocicept* flex* refle*".ab,hw,kf,kw,sy,ti,tw.        | 174     | Advanced |
| 4 | flexion reflex.mp.                                    | 540     | Advanced |
| 5 | RIII.mp.                                              | 75      | Advanced |
| 6 | exp Flexion Reflex/ or nociceptive flexion reflex.mp. | 452     | Advanced |
| 7 | 1 or 2                                                | 3278    | Advanced |
| 8 | 3 or 4 or 5 or 6                                      | 582     | Advanced |
| 9 | 7 and 8                                               | 7       | Advanced |

Appendix 1d. Table S4: Advanced search in Ovid MEDLINE ALL since inception to July 08, 2019

| # | Searches                                                                     | Results | Type     |
|---|------------------------------------------------------------------------------|---------|----------|
| 1 | (nocicept* adj2 (flex* or withdraw*) adj2 reflex??).ab,hw,kf,kw,ot,sy,ti,fx. | 566     | Advanced |
| 2 | (flex* adj2 withdrawal adj2 reflex??).ab,hw,kf,kw,ot,sy,ti,fx.               | 106     | Advanced |

|           |                                                                |       |          |
|-----------|----------------------------------------------------------------|-------|----------|
| <b>3</b>  | ((flex* or withdrawal) adj2 reflex??).ab,hw,kf,kw,ot,sy,ti,fx. | 2569  | Advanced |
| <b>4</b>  | RIII.ab,hw,kf,kw,ot,sy,ti,fx.                                  | 1250  | Advanced |
| <b>5</b>  | 1 or 2 or 3 or 4                                               | 3721  | Advanced |
| <b>6</b>  | fibromyalgia.mp. or Fibromyalgia/                              | 11043 | Advanced |
| <b>7</b>  | fibromyalgi*.ab,hw,kf,kw,ot,sy,ti,fx.                          | 11081 | Advanced |
| <b>8</b>  | widespread musculoskeletal pain.mp.                            | 228   | Advanced |
| <b>9</b>  | 6 or 7 or 8                                                    | 11138 | Advanced |
| <b>10</b> | 5 and 9                                                        | 19    | Advanced |

**APPENDIX 2.** Table S5: Details of the trials' sample size

| <b>Author (Year)</b>    | <b>FM sample size (F:M)</b> | <b>HC sample size (F:M)</b> |
|-------------------------|-----------------------------|-----------------------------|
| <b>Boureau (1991)</b>   | 9 (5:4)                     | 17 (6:11)                   |
| <b>Guieu (1994)</b>     | 18 (13:5)                   | 10 (8:4)                    |
| <b>Desmeules (2003)</b> | 85 (76:9)                   | 40 (35:5)                   |
| <b>Banic (2004)</b>     | 22 (18:4)                   | 25 (20:5)                   |
| <b>Bannett (2012)</b>   | 30 (30:0)                   | 30 (30:0)                   |
| <b>Rhudy (2013)</b>     | 17 (14:3)                   | 19 (16:3)                   |
| <b>Umeda (2013)</b>     | 8 (8:0)                     | 14 (14:0)                   |
| <b>Desmeules (2014)</b> | 134 (127:10)                | 99 (91:8)                   |
| <b>Tanwar (2019)</b>    | 100 (100:0)                 | 72 (72:0)                   |

FM: Fibromyalgia; HC: Healthy Control; F: Females; M: Males.
